## CORRECTION

# Intraflagellar transport 27 is essential for hedgehog signaling but dispensable for ciliogenesis during hair follicle morphogenesis

Ning Yang, Li Li, Thibaut Eguether, John P. Sundberg, Gregory J. Pazour and Jiang Chen

There was an error published in *Development* **142**, 2194-2202.

On p. 2200, Ng et al. (2012) was incorrectly cited in place of Liew et al. (2014). The corrected text and reference appear below. The authors apologise to readers for this mistake.

IFT27 was recently shown to play a crucial role in facilitating ciliary exit of the BBSome (Eguether et al., 2014; Liew et al., 2014), and *Ift27*-deficient mouse embryonic fibroblasts are unable to maintain low levels of SMO in the cilia when the Hh pathway is inactive (Eguether et al., 2014).

Liew, G. M., Ye, F., Nager, A. R., Murphy, J. P., Lee, J. S., Aguiar, M., Breslow, D. K., Gygi, S. P. and Nachury, M. V. (2014). The intraflagellar transport protein IFT27 promotes BBSome exit from cilia through the GTPase ARL6/BBS3. *Dev. Cell* **31**, 265-278.
